# Supplementary material
Source: Elsevier journal article supplement (https://www.sciencedirect.com/science/article/pii/S141335551831013X)
Supplement: mmc1 [file S141335551831013X:mmc1.docx]

**APPENDIX 1.** MEDLINE search syntax.

1. (diagnosis or diagnostic).mp.

2. "gold standard".tw.

3. "reference standard".tw.

4. 1 or 2 or 3

5. sensitiv*.mp.

6. accuracy.mp.

7. test.ti.

8. examination.ti.

9. 5 or 6 or 7 or 8

10. Physical Therapy Modalities/

11. Physical Therapists/

12. Physical Therapy Specialty/

13. "physical therapist*".mp.

14. physiotherap*.mp.

15. Physical Examination/

16. exp Medical History Taking/

17. *Questionnaires/

18. (clinical adj (diagnosis or test* or evaluation or examination)).mp.

19. 10 or 11 or 12 or 13 or 14 or 15 or 16 or 17 or 18

20. 4 and 9 and 19

21. review.pt.

22. "case reports".pt.

23. animals/

24. humans/

25. 23 not (23 and 24)

26. 21 or 22 or 25

27. 20 not 26

**SUPPLEMENTAL MATERIAL.** Reviewed studies.

1. Abramowicz S, Susarla HK, Kim S, Kaban LB. Physical findings associated with active temporomandibular joint inflammation in children with juvenile idiopathic arthritis. *J Oral Maxillofac Surg*. 2013;71:1683-1687.

2. Ackermann O, Liedgens P, Eckert K, et al. Ultrasound diagnosis of juvenile forearm fractures. *J Med Ultrason (2001)*. 2010;37:123-127.

3. Ahn K, Jhun HJ. New physical examination tests for lumbar spondylolisthesis and instability: low midline sill sign and interspinous gap change during lumbar flexion-extension motion orthopedics and biomechanics. *BMC Musculoskelet Disord*. 2015;16:

4. Bland JD. The value of the history in the diagnosis of carpal tunnel syndrome. *J Hand Surg [Br]*. 2000;25:445-450.

5. Burke DT, Burke MA, Bell R, Stewart GW, Mehdi RS, Kim HJ. Subjective swelling: a new sign for carpal tunnel syndrome. *Am J Phys Med Rehabil*. 1999;78:504-508.

6. Carlson RM, Dux K, Stuck RM. Ultrasound imaging for diagnosis of plantar plate ruptures of the lesser metatarsophalangeal joints: a retrospective case series. *J Foot Ankle Surg*. 2013;52:786-788.

7. Cook C, Beaty S, Kissenberth MJ, Siffri P, Pill SG, Hawkins RJ. Diagnostic accuracy of five orthopedic clinical tests for diagnosis of superior labrum anterior posterior (SLAP) lesions.[Erratum appears in J Shoulder Elbow Surg. 2012 May;21(5):707]. *J Shoulder Elbow Surg*. 2012;21:13-22.

8. Cook C, Massa L, Harm-Ernandes I, et al. Interrater reliability and diagnostic accuracy of pelvic girdle pain classification. *J Manipulative Physiol Ther*. 2007;30:252-258.

9. Cook RB, Collins D, Tucker J, Zioupos P. Comparison of questionnaire and quantitative ultrasound techniques as screening tools for DXA. *Osteoporos Int*. 2005;16:1565-1575.

10. de Oliveira Silva D, Briani RV, Pazzinatto MF, et al. Reliability and differentiation capability of dynamic and static kinematic measurements of rearfoot eversion in patellofemoral pain. *Clin Biomech (Bristol, Avon)*. 2015;30:144-148.

11. Duane TM, Dechert T, Wolfe LG, et al. Alcohol's role on the reliability of clinical examination to rule out pelvic fractures. *Am Surg*. 2009;75:257-259.

12. Duane TM, Mayglothling J, Wilson SP, et al. National Emergency X-Radiography Utilization Study criteria is inadequate to rule out fracture after significant blunt trauma compared with computed tomography. *J Trauma*. 2011;70:829-831.

13. Dubrovsky AS, Mok E, Lau SY, Al Humaidan M. Point tenderness at 1 of 5 locations and limited elbow extension identify significant injury in children with acute elbow trauma: a study of diagnostic accuracy. *Am J Emerg Med*. 2015;33:229-233.

14. Fearon AM, Scarvell JM, Cook JL, Smith PNF. Does ultrasound correlate with surgical or histologic findings in greater trochanteric pain syndrome? A pilot study. *Clin Orthop Relat Res*. 2010;468:1838-1844.

15. Feinstein WK, Lichtman DM, Noble PC, Alexander JW, Hipp JA. Quantitative assessment of the midcarpal shift test. *J Hand Surg [Am]*. 1999;24:977-983.

16. Gonzalez YM, Schiffman E, Gordon SM, et al. Development of a brief and effective temporomandibular disorder pain screening questionnaire: reliability and validity. *J Am Dent Assoc*. 2011;142:1183-1191.

17. Goycochea-Robles MV, Sanin LH, Moreno-Montoya J, et al. Validity of the COPCORD core questionnaire as a classification tool for rheumatic diseases. *J Rheumatol Suppl*. 2011;86:31-35.

18. Gumina S, Carbone S, Albino P, Gurzi M, Postacchini F. Arm Squeeze Test: a new clinical test to distinguish neck from shoulder pain. *Eur Spine J*. 2013;22:1558-1563.

19. Gunnarsson LG, Amilon A, Hellstrand P, Leissner P, Philipson L. The diagnosis of carpal tunnel syndrome. Sensitivity and specificity of some clinical and electrophysiological tests. *J Hand Surg [Br]*. 1997;22:34-37.

20. Johnson LL, Johnson AL, Colquitt JA, Simmering MJ, Pittsley AW. Is it possible to make an accurate diagnosis based only on a medical history? A pilot study on women's knee joints. *Arthroscopy*. 1996;12:709-714.

21. Karachalios T, Hantes M, Zibis AH, Zachos V, Karantanas AH, Malizos KN. Diagnostic accuracy of a new clinical test (the Thessaly test) for early detection of meniscal tears. *J Bone Joint Surg Am*. 2005;87:955-962.

22. Korovessis P, Dimas A, Koureas G, Zacharatos S, Petsinis G, Baikousis A. Correlative analysis of reliability and validity of plain radiology, MOS short-form health survey and surgical examination in making decision for treatment of chronic low back pain patients. *Eur J Orthop Surg Traumatol*. 2004;14:135-141.

23. Krabben A, Stomp W, Huizinga TWJ, et al. Concordance between inflammation at physical examination and on MRI in patients with early arthritis. *Ann Rheum Dis*. 2015;74:506-512.

24. Laslett M, Oberg B, Aprill CN, McDonald B. Centralization as a predictor of provocation discography results in chronic low back pain, and the influence of disability and distress on diagnostic power. *Spine J*. 2005;5:370-380.

25. Levin RW, Park J, Ostrov B, et al. Clinical assessment of the 1987 American College of Rheumatology criteria for rheumatoid arthritis. *Scand J Rheumatol*. 1996;25:277-281.

26. Ling SM, Fried LP, Garrett E, Hirsch R, Guralnik JM, Hochberg MC. The accuracy of self-report of physician diagnosed rheumatoid arthritis in moderately to severely disabled older women. Women's Health and Aging Collaborative Research Group. *J Rheumatol*. 2000;27:1390-1394.

27. Litaker D, Pioro M, El Bilbeisi H, Brems J. Returning to the bedside: using the history and physical examination to identify rotator cuff tears. *J Am Geriatr Soc*. 2000;48:1633-1637.

28. Marpaung CM, Kalaykova SI, Lobbezoo F, Naeije M. Validity of functional diagnostic examination for temporomandibular joint disc displacement with reduction. *J Oral Rehabil*. 2014;41:243-249.

29. Martin HD, Kivlan BR, Palmer IJ, Martin RL. Diagnostic accuracy of clinical tests for sciatic nerve entrapment in the gluteal region. *Knee Surg Sports Traumatol Arthrosc*. 2014;22:882-888.

30. Mohammadi A, Ghasemi-Rad M. Nasal bone fracture--ultrasonography or computed tomography? *Med Ultrason*. 2011;13:292-295.

31. Molloy S, Solan MC, Bendall SP. Synovial impingement in the ankle: a new physical sign. *J Bone Joint Surg Br*. 2003;85B:330-333.

32. Molto A, Paternotte S, Comet D, et al. Performances of the Assessment of SpondyloArthritis International Society axial spondyloarthritis criteria for diagnostic and classification purposes in patients visiting a rheumatologist because of chronic back pain: results from a multicenter, cross-sectional study. *Arthritis Care Res (Hoboken)*. 2013;65:1472-1481.

33. Nakagawa S, Yoneda M, Hayashida K, Obata M, Fukushima S, Miyazaki Y. Forced shoulder abduction and elbow flexion test: a new simple clinical test to detect superior labral injury in the throwing shoulder. *Arthroscopy*. 2005;21:1290-1295.

34. O'Driscoll SW, Goncalves LB, Dietz P. The hook test for distal biceps tendon avulsion. *Am J Sports Med*. 2007;35:1865-1869.

35. Pavic R, Margetic P, Bensic M, Brnadic RL. Diagnostic value of US, MR and MR arthrography in shoulder instability. *Injury*. 2013;44 Suppl 3:S26-32.

36. Razmjou H, Holtby R, Myhr T. Pain provocative shoulder tests: reliability and validity of the impingement tests. *Physiother Can*. 2004;56:229-236.

37. Saengnipanthkul S, Sirichativapee W, Kowsuwon W, Rojviroj S. The effects of medial patellar plica on clinical diagnosis of medial meniscal lesion. *J Med Assoc Thai*. 1992;75:704-708.

38. Salvarani C, Silingardi M, Ghirarduzzi A, et al. Is duplex ultrasonography useful for the diagnosis of giant-cell arteritis? *Ann Intern Med*. 2002;137:232-238.

39. Sandler DA, Martin JF, Duncan JS, et al. Diagnosis of deep-vein thrombosis: comparison of clinical evaluation, ultrasound, plethysmography, and venoscan with X-ray venogram. *Lancet*. 1984;2:716-719.

40. Siegenthaler A, Eichenberger U, Schmidlin K, Arendt-Nielsen L, Curatolo M. What does local tenderness say about the origin of pain? An investigation of cervical zygapophysial joint pain. *Anesth Analg*. 2010;110:923-927.

41. Smith KR, Brown CK, Brewer KL. Can clinical prediction rules used in acute pediatric ankle and midfoot injuries be applied to an adult population? *Am J Emerg Med*. 2011;29:441-445.

42. Spadaro A, Iagnocco A, Baccano G, Ceccarelli F, Sabatini E, Valesini G. Sonographic-detected joint effusion compared with physical examination in the assessment of sacroiliac joints in spondyloarthritis. *Ann Rheum Dis*. 2009;68:1559-1563.

43. Toprak U, Ustuner E, Ozer D, et al. Palpation tests versus impingement tests in Neer stage I and II subacromial impingement syndrome. *Knee Surg Sports Traumatol Arthrosc*. 2013;21:424-429.

44. Uchihara T, Furukawa T, Tsukagoshi H. Compression of brachial plexus as a diagnostic test of cervical cord lesion. *Spine*. 1994;19:2170-2173.

45. van Dijk CN, Mol BW, Lim LS, Marti RK, Bossuyt PM. Diagnosis of ligament rupture of the ankle joint. Physical examination, arthrography, stress radiography and sonography compared in 160 patients after inversion trauma. *Acta Orthop Scand*. 1996;67:566-570.

46. Vogt TM, Ross PD, Palermo L, et al. Vertebral fracture prevalence among women screened for the Fracture Intervention Trial and a simple clinical tool to screen for undiagnosed vertebral fractures. Fracture Intervention Trial Research Group. *Mayo Clin Proc*. 2000;75:888-896.

47. Wainner RS, Fritz JM, Irrgang JJ, Boninger ML, Delitto A, Allison S. Reliability and diagnostic accuracy of the clinical examination and patient self-report measures for cervical radiculopathy. *Spine*. 2003;28:52-62.

48. Weinstabl R, Muellner T, Vecsei V, Kainberger F, Kramer M. Economic considerations for the diagnosis and therapy of meniscal lesions: can magnetic resonance imaging help reduce the expense? *World J Surg*. 1997;21:363-368.

49. Werner CM, Hoch A, Gautier L, Konig MA, Simmen HP, Osterhoff G. Distraction test of the posterior superior iliac spine (PSIS) in the diagnosis of sacroiliac joint arthropathy. *BMC Surg*. 2013;13:52.

50. Werner SG, Langer HE, Ohrndorf S, et al. Inflammation assessment in patients with arthritis using a novel in vivo fluorescence optical imaging technology.[Erratum appears in Ann Rheum Dis. 2012 Oct;71(10):1756], [Erratum appears in Ann Rheum Dis. 2013 Jan;72(1):156]. *Ann Rheum Dis*. 2012;71:504-510.
